# Supplementary material for: Yeast interfering RNA larvicides targeting neural genes induce high rates of Anopheles larval mortality
Source: Malar J. 2017 Nov 13;16:461. doi: 10.1186/s12936-017-2112-5 (PMC5683233; doi:10.1186/s12936-017-2112-5)
Supplement: Supplementary file 1 — Additional file 1. Lack of siRNA larvicide target site conservation in non‐target organisms. Summary of Blast search results. [file 12936_2017_2112_MOESM1_ESM.pdf]

## Lack of siRNA Larvicide Target Site Conservation in Non-target Organisms

| Organism or Group of Organisms | Identifying Code TaxID | Match with Sac1.1? | Match with Sac1.91? | Match with lrc.2? | Match with lrc.51? | Match with otk.16? | Match with otk.94? | Match with Control? |
|--------------------------------|------------------------|--------------------|---------------------|-------------------|--------------------|--------------------|--------------------|---------------------|
| <i>A. gambiae</i>              | 7165                   | yes                | yes                 | yes               | yes                | yes                | yes                | no                  |
| <i>A. aegypti</i>              | 7158                   | no                 | no                  | no                | no                 | no                 | no                 | no                  |
| Amphibians                     | 8292                   | no                 | no                  | no                | no                 | no                 | no                 | no                  |
| Birds                          | 8782                   | no                 | no                  | no                | no                 | no                 | no                 | no                  |
| Fish                           | 7898                   | no                 | no                  | no                | no                 | no                 | no                 | no                  |
| Fungi                          | 4751                   | no                 | no                  | no                | no                 | no                 | no                 | no                  |
| Human                          | 9606                   | no                 | no                  | no                | no                 | no                 | no                 | no                  |
| Mammals                        | 40674                  | no                 | no                  | no                | no                 | no                 | no                 | no                  |
| Plants                         | 3193                   | no                 | no                  | no                | no                 | no                 | no                 | no                  |
| Reptiles                       | 8504                   | no                 | no                  | no                | no                 | no                 | no                 | no                  |

**Additional File 1.** The 25 bp target sequences of the six interfering RNAs (Sac1.1, Sac1.91, lrc.2, lrc.51, otk.16, otk.94) used to silence *A. gambiae* genes in this investigation, as well as the control target sequence, were used as query sequences in NCBI BLAST searches [17] conducted using the nucleotide collection database by organism using the taxonomic identification numbers (TaxIDs) indicated. As of September 2017, other than the matches in *A. gambiae*, the organisms and taxa noted above lack identical 25 bp matches to the target sequences. Furthermore, with one exception, an identical match for the Sac1.1 target sequence in *Chlamydomonas reinhardtii* sequence XM\_001692925.1, searches against all sequences in the BLAST database did not uncover any perfect matches outside of *Anopheles*.
